# Supplementary material for: An Intracellular Epitope of ASFV CD2v Protein Elicits Humoral and Cellular Immune Responses
Source: MDPI journal article supplement (doi:10.3390/ani13121967), 2023-06-12
Supplement: s1 [file s1]

Figure S1

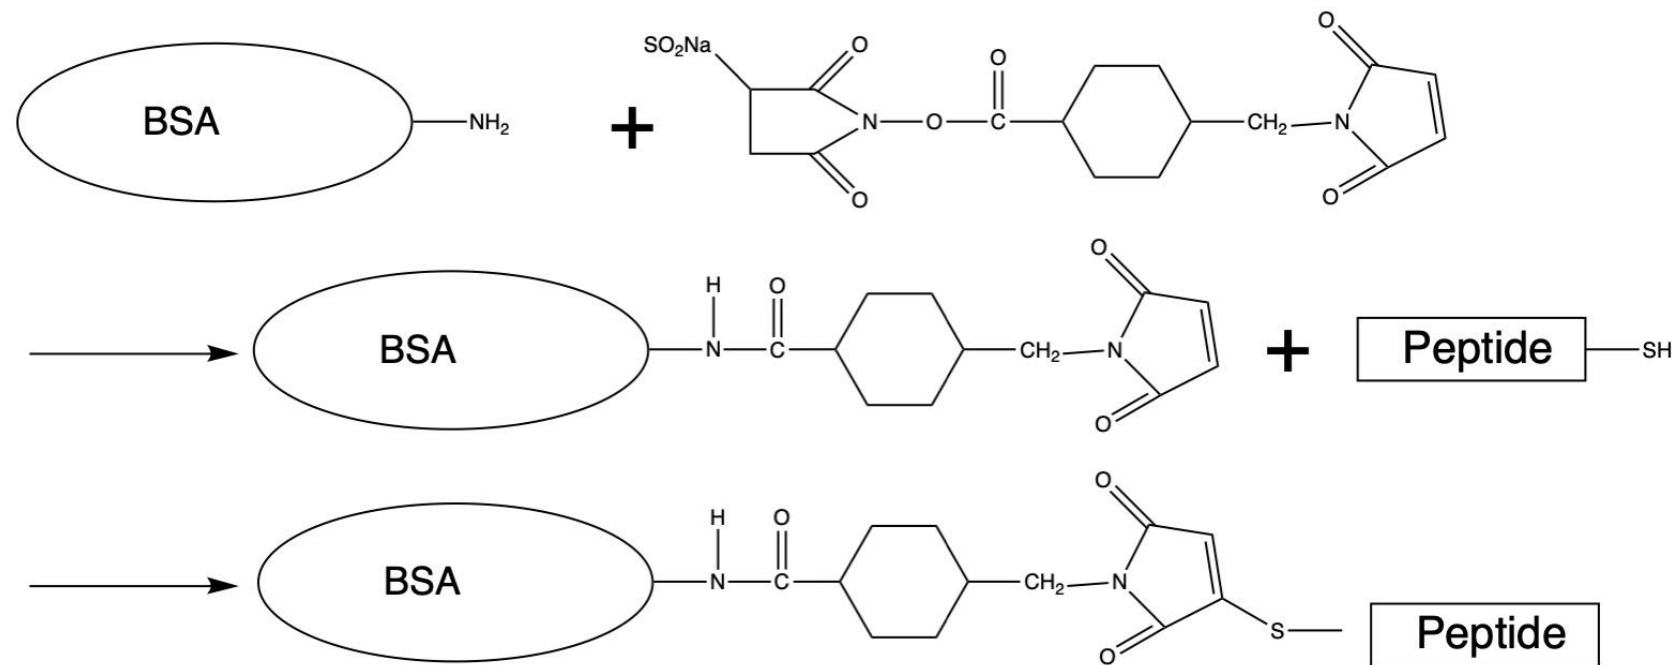

Figure S2

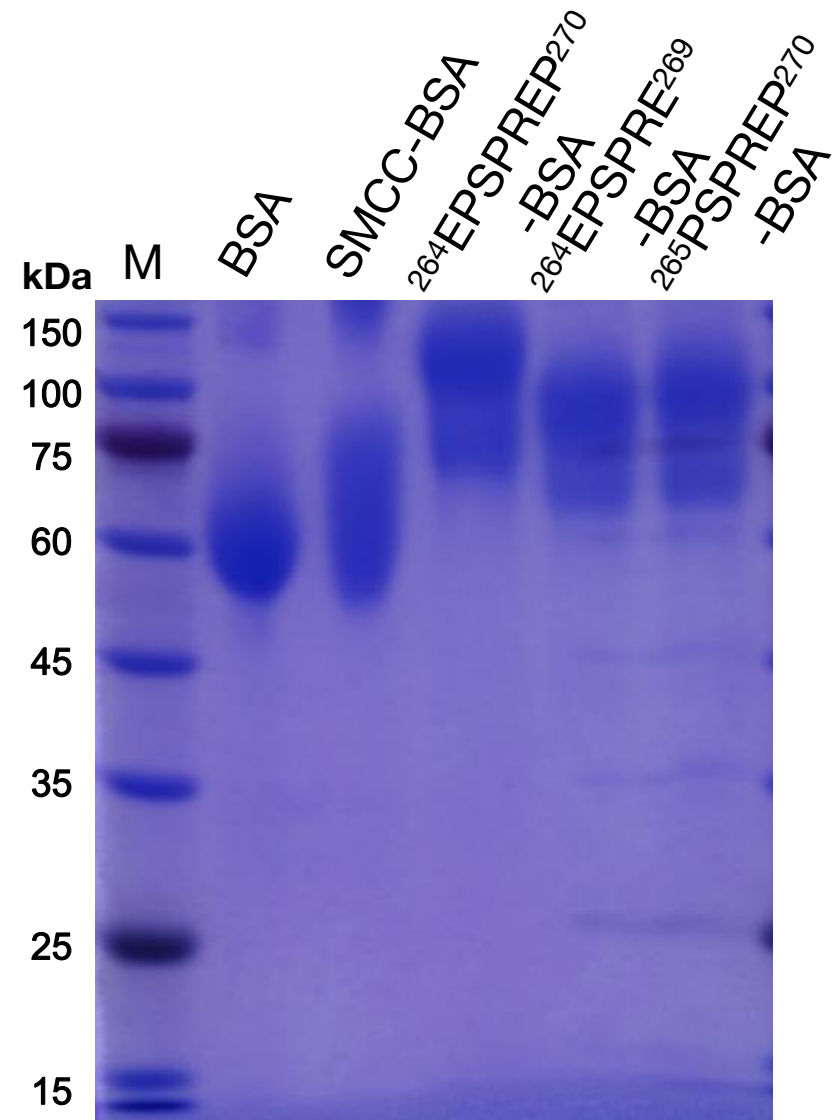

# Figure S3

|                                      | 310                                   | 315           | 320               | 325 | 330 |
|--------------------------------------|---------------------------------------|---------------|-------------------|-----|-----|
|                                      | TTSIH E P S P R E P L L P K P Y S R Y |               |                   |     |     |
| AL-2022-Italy (360 aa)               | TTSIH                                 | E P S P R E P | L L P K P Y S R Y |     |     |
| Amur-19-WB-6905 (360 aa)             | TTSIH                                 | E P S P R E P | L L P K P Y S R Y |     |     |
| ASFV-wbBS01 (360 aa)                 | TTSIH                                 | E P S P R E P | L L P K P Y S R Y |     |     |
| AZP54004.1 (360 aa)                  | TTSIH                                 | E P S P R E P | L L P K P Y S R Y |     |     |
| China-2018-AnhuiXCGQ (360 aa)        | TTSIH                                 | E P S P R E P | L L P K P Y S R Y |     |     |
| CN-2019-InnerMongolia-AES01 (360 aa) | TTSIH                                 | E P S P R E P | L L P K P Y S R Y |     |     |
| DB-LN-2018 (360 aa)                  | TTSIH                                 | E P S P R E P | L L P K P Y S R Y |     |     |
| Georgia-2007-1 (360 aa)              | TTSIH                                 | E P S P R E P | L L P K P Y S R Y |     |     |
| IND-AR-SD-61-2020 (360 aa)           | TTSIH                                 | E P S P R E P | L L P K P Y S R Y |     |     |
| K-49 (369 aa)                        | TTSIH                                 | E P S P R E P | L L P K P Y S R Y |     |     |
| Korea-YCI-2019 (360 aa)              | TTSIH                                 | E P S P R E P | L L P K P Y S R Y |     |     |
| Kyiv-2016-131 (360 aa)               | TTSIH                                 | E P S P R E P | L L P K P Y S R Y |     |     |
| Lisbon-57 (398 aa)                   | TTSIH                                 | E P S P R E P | L L P K P Y S R Y |     |     |
| LT14-1490 (360 aa)                   | TTSIH                                 | E P S P R E P | L L P K P Y S R Y |     |     |
| M-78 (379 aa)                        | TTSIH                                 | E P S P R E P | L L P K P Y S R Y |     |     |
| MAL-19-Karonga (360 aa)              | TTSIH                                 | E P S P R E P | L L P K P Y S R Y |     |     |
| O-77 (402 aa)                        | TTSIH                                 | E P S P R E P | L L P K P Y S R Y |     |     |
| Pig-HLJ-2018 (360 aa)                | TTSIH                                 | E P S P R E P | L L P K P Y S R Y |     |     |
| Pol16_20186_o7 (360 aa)              | TTSIH                                 | E P S P R E P | L L P K P Y S R Y |     |     |
| Pol17_03029_C201 (360 aa)            | TTSIH                                 | E P S P R E P | L L P K P Y S R Y |     |     |
| Pol18_28298_O111 (360 aa)            | TTSIH                                 | E P S P R E P | L L P K P Y S R Y |     |     |
| Pol19_53050_C1959 (360 aa)           | TTSIH                                 | E P S P R E P | L L P K P Y S R Y |     |     |
| Primorsky-19-WB-6723 (360 aa)        | TTSIH                                 | E P S P R E P | L L P K P Y S R Y |     |     |
| QED90501.1 (360 aa)                  | TTSIH                                 | E P S P R E P | L L P K P Y S R Y |     |     |
| QGJ83420.1 (360 aa)                  | TTSIH                                 | E P S P R E P | L L P K P Y S R Y |     |     |
| QOY24166.1 (360 aa)                  | TTSIH                                 | E P S P R E P | L L P K P Y S R Y |     |     |
| Timor-Leste-2019-1 (360 aa)          | TTSIH                                 | E P S P R E P | L L P K P Y S R Y |     |     |
| TS7 (392 aa)                         | TTSIH                                 | E P S P R E P | L L P K P Y S R Y |     |     |
| TSP80 (373 aa)                       | TTSIH                                 | E P S P R E P | L L P K P Y S R Y |     |     |
| UDP03346.1 (360 aa)                  | TTSIH                                 | E P S P R E P | L L P K P Y S R Y |     |     |
| Uganda (370 aa)                      | TTSIH                                 | E P S P R E P | L L P K P Y S R Y |     |     |
| Ulyanovsk-19-WB-5699 (360 aa)        | TTSIH                                 | E P S P R E P | L L P K P Y S R Y |     |     |
