# Supplementary material for: An Intracellular Epitope of ASFV CD2v Protein Elicits Humoral and Cellular Immune Responses
Source: MDPI journal article supplement (doi:10.3390/ani13121967), 2023-06-12
Supplement: s1 [file s1]

Table S1. Primers for the eukaryotic expression of recombinant protein CD2v

| Peptides                           | Sequences (5'-3')                                   |
|------------------------------------|-----------------------------------------------------|
| The full-length CD2v-F             | gatcggatccggATGATCATCCTGATCTTCC                     |
| The full-length CD2v-R             | gatcaagctttaGATGATGCGATCGACG                        |
| The intracellular domain of CD2v-F | gatcggatccggtctttacgaaaaagaaaaaacat                 |
| The intracellular domain of CD2v-R | gatctctagattaaataattctatctacgtgaataagcgaaatattttggg |

Table S2. Sequences of primers to amplify the variable region of heavy and light chains of monoclonal antibodies

| Peptides | Sequences (5'-3')                |
|----------|----------------------------------|
| VH-F     | asrtcmagctgcaggagtctgg           |
| VH-R     | tgaggagacggtgaccgtggcccttgccccag |
| VL-F     | gacattgagctcaccagctctcca         |
| VL-R     | gttagatctcgagcttggtccc           |

Table S3. The corresponding nucleotide sequences of the peptides of CD2v

| Peptides         | Sequences (5'-3')              |
|------------------|--------------------------------|
| CD2v (262-271aa) | ATCCACGAGCCCTCCCCTCGCGAGCCTCTG |
| CD2v (262-270aa) | ATCCACGAGCCCTCCCCTCGCGAGCCT    |
| CD2v (263-271aa) | CACGAGCCCTCCCCTCGCGAGCCTCTG    |
| CD2v (264-270aa) | GAGCCCTCCCCTCGCGAGCCT          |
